# Supplementary material
Source: HighWire-hosted journal article supplement (https://bmjopen.bmj.com/content/12/9/e061519)
Supplement: inline-supplementary-material-3 [file inline-supplementary-material-3.pdf]

Supplementary table 2: Included studies

| No. | Authors               | Year | Title                                                                                                                                          | Country          | Specialty  | Disease studied      | Sample size | Intervention                                        | Control                                                                | Blinding                   | Primary outcome             | Trial registration |
|-----|-----------------------|------|------------------------------------------------------------------------------------------------------------------------------------------------|------------------|------------|----------------------|-------------|-----------------------------------------------------|------------------------------------------------------------------------|----------------------------|-----------------------------|--------------------|
| 1.  | Sadasiva<br>m, et al. | 2016 | Impact of a<br>Collective<br>Intelligence<br>Tailored Messaging<br>System on Smoking<br>Cessation: The<br>Perspect<br>Randomized<br>Experiment | United<br>States | Medicine   | Smoking<br>addiction | 120         | AI<br>recommended<br>motivational<br>messages       | Standard<br>tailored<br>messages                                       | Single<br>(study<br>staff) | Influence<br>of<br>messages | NR                 |
| 2.  | Morrison<br>, et al.  | 2017 | The Effect of<br>Timing and<br>Frequency of Push<br>Notifications on<br>Usage of a<br>Smartphone- Based<br>Stress Management                   | United<br>States | Psychiatry | Stress               | 77          | Smartphone-<br>based stress<br>management<br>system | Daily/oc<br>casional<br>notificati<br>ons<br>within<br>pre-<br>defined | Not stated                 | Notificatio<br>n response   | ISRCTN6717<br>7737 |

|    |                  |      | Intervention: An Exploratory Trial                                                                      |                |                  |                 |      |                                                      | time frames          |            |                        |                     |
|----|------------------|------|---------------------------------------------------------------------------------------------------------|----------------|------------------|-----------------|------|------------------------------------------------------|----------------------|------------|------------------------|---------------------|
| 3. | Labovitz, et al. | 2017 | Using Artificial Intelligence to Reduce the Risk of Nonadherence in Patients on Anticoagulation Therapy | United States  | Cardiology       | Ischemic stroke | 28   | AI system monitoring                                 | No daily monitoring  | Not stated | Adherence to therapy   | NCT02599259         |
| 4. | Rostill, et al.  | 2018 | Technology integrated health management for dementia                                                    | United Kingdom | Psychiatry       | Dementia        | 408  | Technology-integrated health management for dementia | No TIHM              | Not stated | Alerts                 | NR                  |
| 5. | Wang, et al      | 2018 | Real-time automatic detection system increases colonoscopic polyp and adenoma                           | China          | Gastroenterology | Adenoma         | 1058 | AI-aided colonoscopy                                 | Standard colonoscopy | None       | Adenoma detection rate | ChiCTR-DDD-17012221 |

|    |             |      |                                                                                                                                                                                       |       |               |          |     |                                |               |        |                                              |             |
|----|-------------|------|---------------------------------------------------------------------------------------------------------------------------------------------------------------------------------------|-------|---------------|----------|-----|--------------------------------|---------------|--------|----------------------------------------------|-------------|
|    |             |      | detection rates: a prospective randomised controlled study                                                                                                                            |       |               |          |     |                                |               |        |                                              |             |
| 6. | Lin, et al. | 2019 | Diagnostic Efficacy and Therapeutic Decision-making Capacity of an Artificial Intelligence Platform for Childhood Cataracts in Eye Clinics: A Multicentre Randomized Controlled Trial | China | Ophthalmology | Cataract | 350 | AI-assisted cataract detection | Normal clinic | Double | Diagnostic accuracy for congenital cataracts | NCT03240848 |

|    |              |      |                                                                                                                                           |               |                  |                  |     |                                     |                                     |        |                                                     |                  |
|----|--------------|------|-------------------------------------------------------------------------------------------------------------------------------------------|---------------|------------------|------------------|-----|-------------------------------------|-------------------------------------|--------|-----------------------------------------------------|------------------|
| 7. | Voss, et al. | 2019 | Effect of Wearable Digital Intervention for Improving Socialization in Children With Autism Spectrum Disorder A Randomized Clinical Trial | United States | Psychiatry       | Autism           | 474 | AI-driven behavioral intervention   | Applied behavioral analysis therapy | Single | SRS-II, EGG, VABS-II, NEPSY-II socialization scores | NCT03569176      |
| 8. | Wu, et al.   | 2019 | Randomised controlled trial of WISENSE, a real-time quality improving system for monitoring blind spots                                   | China         | Gastroenterology | Upper GI lesions | 324 | AI-aided esophagogastroduodenoscopy | Standard esophagogastroduodenoscopy | Single | Blind spot rate                                     | ChiCTR1800014809 |

|     |                 |      |                                                                                                                                                    |               |                  |              |      |                        |                             |        |                                     |                  |
|-----|-----------------|------|----------------------------------------------------------------------------------------------------------------------------------------------------|---------------|------------------|--------------|------|------------------------|-----------------------------|--------|-------------------------------------|------------------|
|     |                 |      | during<br>esophagogastroduo<br>denoscopy                                                                                                           |               |                  |              |      |                        |                             |        |                                     |                  |
| 9.  | Wang, et al.    | 2020 | Effect of a deep-learning computer-aided detection system on adenoma detection during colonoscopy (CADE-DB trial): a double-blind randomised study | China         | Gastroenterology | Adenoma      | 1046 | AI-aided colonoscopy   | Sham                        | Double | Adenoma detection rate              | ChiCTR1800017675 |
| 10. | Persell, et al. | 2020 | Effect of Home Blood Pressure Monitoring via a Smartphone Hypertension Coaching                                                                    | United States | Medicine         | Hypertension | 333  | AI-driven coaching app | Blood pressure tracking app | None   | Systolic blood pressure at 6 months | NCT03288142      |

|     |                       |      |                                                                                                                                                               |             |            |                             |    |                                                               |               |      |                                                     |             |
|-----|-----------------------|------|---------------------------------------------------------------------------------------------------------------------------------------------------------------|-------------|------------|-----------------------------|----|---------------------------------------------------------------|---------------|------|-----------------------------------------------------|-------------|
|     |                       |      | Application or Tracking Application on Adults With Uncontrolled Hypertension A Randomized Clinical Trial                                                      |             |            |                             |    |                                                               |               |      |                                                     |             |
| 11. | Wijnberg<br>e, et al. | 2020 | Effect of a Machine Learning-Derived Early Warning System for Intraoperative Hypotension vs Standard Care on Depth and Duration of Intraoperative Hypotension | Netherlands | Cardiology | Intra-operative hypotension | 68 | AI-driven early warning system for intraoperative hypotension | Standard care | None | Time-weighted average of intraoperative hypotension | NCT03376347 |

|     |               |      |                                                                                                            |                |               |                   |     |                                       |                       |        |                                                                       |             |
|-----|---------------|------|------------------------------------------------------------------------------------------------------------|----------------|---------------|-------------------|-----|---------------------------------------|-----------------------|--------|-----------------------------------------------------------------------|-------------|
|     |               |      | During Elective<br>Noncardiac Surgery<br>The HYPE<br>Randomized<br>Clinical Trial                          |                |               |                   |     |                                       |                       |        |                                                                       |             |
| 12. | Pavel, et al. | 2020 | A machine-learning algorithm for neonatal seizure recognition: a multicentre, randomised, controlled trial | United Kingdom | Neurology     | Neonatal seizures | 264 | Automated seizure detection algorithm | Conventional EEG      | Single | Diagnostic accuracy of healthcare professionals with aid of algorithm | NCT02431780 |
| 13. | Nimri, et al. | 2020 | Insulin dose optimization using an automated artificial intelligence-based decision support                | Israel         | Endocrinology | Diabetes          | 108 | AI-based decision support system      | Physician guided care | Single | Time of glucose level within target range                             | NCT03003806 |

|     |              |      |                                                                                                                                  |       |                  |         |     |                      |                        |        |                        |                  |
|-----|--------------|------|----------------------------------------------------------------------------------------------------------------------------------|-------|------------------|---------|-----|----------------------|------------------------|--------|------------------------|------------------|
|     |              |      | system in youths with type 1 diabetes                                                                                            |       |                  |         |     |                      |                        |        |                        |                  |
| 14. | Liu, et al.  | 2020 | The single-monitor trial: an embedded CADe system increased adenoma detection during colonoscopy: a prospective randomized study | China | Gastroenterology | Adenoma | 790 | AI-aided colonoscopy | Routine colonoscopy    | None   | Adenoma detection rate | ChiCTR1800018058 |
| 15. | Gong, et al. | 2020 | Detection of colorectal adenomas with a real-time computer-aided system (ENDOANGEL): a randomised                                | China | Gastroenterology | Adenoma | 704 | AI-aided colonoscopy | Unassisted colonoscopy | Single | Adenoma detection rate | ChiCTR1900021984 |



|     |              |      |                                                                                                                               |       |                  |                             |     |                            |                     |      |                      |                         |
|-----|--------------|------|-------------------------------------------------------------------------------------------------------------------------------|-------|------------------|-----------------------------|-----|----------------------------|---------------------|------|----------------------|-------------------------|
|     |              |      | controlled study                                                                                                              |       |                  |                             |     |                            |                     |      |                      |                         |
| 16. | Luo, et al.  | 2020 | Artificial Intelligence-Assisted Colonoscopy for Detection of Colon Polyps: a Prospective, Randomized Cohort Study            | China | Gastroenterology | Polyps                      | 150 | AI-aided colonoscopy       | Unaided colonoscopy | None | Polyp detection rate | NCT0471262<br>65        |
| 17. | Anan, et al. | 2021 | Effects of an Artificial Intelligence-Assisted Health Program on Workers With Neck/Shoulder Pain/Stiffness and Low Back Pain: | Japan | Orthopaedics     | Neck/shoulder and back pain | 94  | AI-assisted health program | Usual care routine  | None | Pain level           | (UMIN-CTR)<br>000033894 |

|     |                  |      |                                                                                                                                                                |         |            |                |     |                           |                          |        |                                      |             |
|-----|------------------|------|----------------------------------------------------------------------------------------------------------------------------------------------------------------|---------|------------|----------------|-----|---------------------------|--------------------------|--------|--------------------------------------|-------------|
|     |                  |      | Randomized<br>Controlled Trial                                                                                                                                 |         |            |                |     |                           |                          |        |                                      |             |
| 18. | Blomberg, et al. | 2021 | Effect of Machine Learning on Dispatcher Recognition of Out-of-Hospital Cardiac Arrest During Calls to Emergency Medical Services: A Randomized Clinical Trial | Denmark | Cardiology | Cardiac arrest | 654 | AI-led alerts             | Normal protocol          | Double | Recognition of cardiac arrest        | NCT04219306 |
| 19. | Chen, et al.     | 2021 | The Role of Deep Learning-Based Echocardiography in the Diagnosis and Evaluation of the Effects of Routine Anti-Heart-                                         | China   | Cardiology | Heart failure  | 80  | AI-based echocardiography | Routine echocardiography | None   | Mortality and rehospitalization rate | NR          |

|     |                |      |                                                                                                   |               |           |                            |      |                                    |                       |        |                                                   |               |
|-----|----------------|------|---------------------------------------------------------------------------------------------------|---------------|-----------|----------------------------|------|------------------------------------|-----------------------|--------|---------------------------------------------------|---------------|
|     |                |      | Failure Western Medicines in Elderly Patients with Acute Left Heart Failure                       |               |           |                            |      |                                    |                       |        |                                                   |               |
| 20. | Eng, et al.    | 2021 | Artificial Intelligence Algorithm Improves Radiologist Performance in Skeletal Age Assessment     | United States | Radiology | Skeletal age               | 1903 | AI diagnostic aid                  | Without aid           | None   | Mean absolute difference between the skeletal age | NCT03530098   |
| 21. | Harada, et al. | 2021 | Efficacy of artificial-intelligence-driven differential-diagnosis list on the diagnostic accuracy | Japan         | Medicine  | Various medical conditions | 22   | AI-assisted differential diagnosis | Without AI assistance | Single | Diagnostic accuracy                               | UMIN000042881 |

|     |                   |      |                                                                                                                          |               |              |                        |     |                                 |                      |        |                          |             |
|-----|-------------------|------|--------------------------------------------------------------------------------------------------------------------------|---------------|--------------|------------------------|-----|---------------------------------|----------------------|--------|--------------------------|-------------|
|     |                   |      | of physicians: An open-label randomized controlled study                                                                 |               |              |                        |     |                                 |                      |        |                          |             |
| 22. | Hassoon, et al.   | 2021 | Randomized trial of two artificial intelligence coaching interventions to increase physical activity in cancer survivors | United States | Oncology     | Different cancer types | 42  | AI coaching                     | Written information  | Single | Change in steps per day  | NCT03212079 |
| 23. | Jayakumar, et al. | 2021 | Comparison of an Artificial Intelligence-Enabled Patient Decision Aid vs Educational Material on                         | United States | Orthopaedics | Osteoarthritis         | 129 | AI-enabled patient decision aid | Educational material | None   | Knee OA Decision Quality | NCT03956004 |

|     |               |      |                                                                                                                                                       |       |                  |         |     |                      |                     |      |                   |                |
|-----|---------------|------|-------------------------------------------------------------------------------------------------------------------------------------------------------|-------|------------------|---------|-----|----------------------|---------------------|------|-------------------|----------------|
|     |               |      | Decision Quality, Shared Decision-Making, Patient Experience, and Functional Outcomes in Adults with Knee Osteoarthritis: A Randomized Clinical Trial |       |                  |         |     |                      |                     |      |                   |                |
| 24. | Kamba, et al. | 2021 | Reducing adenoma miss rate of colonoscopy assisted by artificial intelligence: a multicenter randomized controlled trial                              | Japan | Gastroenterology | Adenoma | 358 | AI-aided colonoscopy | Unaided colonoscopy | None | Adenoma miss rate | jRCTs032190061 |

|     |                |      |                                                                                                                                                                                       |               |            |                                          |    |                                         |                        |        |                             |                |
|-----|----------------|------|---------------------------------------------------------------------------------------------------------------------------------------------------------------------------------------|---------------|------------|------------------------------------------|----|-----------------------------------------|------------------------|--------|-----------------------------|----------------|
| 25. | Luna, et al.   | 2021 | Artificial intelligence application versus physical therapist for squat evaluation: a randomized controlled trial                                                                     | United States | Medicine   | Physical therapy                         | 30 | AI-assisted exercise application        | Unassisted exercise    | Single | Successful squats           | NCT04624594    |
| 26. | Medina, et al. | 2021 | Electrophysiological brain changes associated with cognitive improvement in a pediatric attention deficit hyperactivity disorder digital artificial intelligence-driven intervention: | Spain         | Psychiatry | Attention deficit hyperactivity disorder | 29 | AI-driven cognitive stimulation program | Commercial video games | Single | Conners CPT (CPT-III) score | ISRCTN71041318 |

|     |                   |      |                                                                                                                            |               |                  |                             |     |                                    |                                  |      |                                    |              |
|-----|-------------------|------|----------------------------------------------------------------------------------------------------------------------------|---------------|------------------|-----------------------------|-----|------------------------------------|----------------------------------|------|------------------------------------|--------------|
|     |                   |      | Randomized controlled trial                                                                                                |               |                  |                             |     |                                    |                                  |      |                                    |              |
| 27. | Mertens, et al.   | 2021 | Artificial intelligence for caries detection: Randomized trial                                                             | Germany       | Dentistry        | Caries                      | 22  | AI-based diagnostic support        | Unaided diagnosis                | None | Accuracy metrics                   | DRKS00022357 |
| 28. | Prochaska, et al. | 2021 | A randomized controlled trial of a therapeutic relational agent for reducing substance misuse during the COVID-19 pandemic | United States | Medicine         | Substance-related disorders | 180 | AI relational conversational agent | No intervention during the study | None | Past-month substance use occasions | NCT04096001  |
| 29. | Rafferty, et al.  | 2021 | A novel mobile app (heali) for disease treatment in participants with irritable bowel                                      | United States | Gastroenterology | Irritable bowel syndrome    | 58  | AI dietary mobile app              | Educational material             | None | Quality of life score              | NCT04256551  |

|     |              |      |                                                                                                                                                                                   |               |               |                  |     |                              |                   |        |                                                |             |
|-----|--------------|------|-----------------------------------------------------------------------------------------------------------------------------------------------------------------------------------|---------------|---------------|------------------|-----|------------------------------|-------------------|--------|------------------------------------------------|-------------|
|     |              |      | syndrome:<br>Randomized<br>controlled pilot trial                                                                                                                                 |               |               |                  |     |                              |                   |        |                                                |             |
| 30. | Seok, et al. | 2021 | A personalized 3d-printed model for obtaining informed consent process for thyroid surgery: A randomized clinical study using a deep learning approach with mesh-type 3d modeling | Korea         | Endocrinology | Thyroid lesions  | 53  | AI 3D-printed thyroid model  | Without model     | None   | Patient general knowledge and satisfaction     | KCT0005069  |
| 31. | Seol, et al. | 2021 | Artificial intelligence-assisted clinical decision support for childhood asthma management: A                                                                                     | United States | Paediatrics   | Childhood asthma | 184 | AI-assisted decision support | Usual asthma care | Single | Asthma exacerbation occurrence within one year | NCT02865967 |



|     |                   |      |                                                                                                                                                      |               |             |                                       |     |                                  |                             |      |                                      |             |
|-----|-------------------|------|------------------------------------------------------------------------------------------------------------------------------------------------------|---------------|-------------|---------------------------------------|-----|----------------------------------|-----------------------------|------|--------------------------------------|-------------|
|     |                   |      | randomized clinical trial                                                                                                                            |               |             |                                       |     |                                  |                             |      |                                      |             |
| 32. | Stromblad, et al. | 2021 | Effect of a Predictive Model on Planned Surgical Duration Accuracy, Patient Wait Time, and Use of Presurgical Resources: A Randomized Clinical Trial | United States | Surgery     | Gynaecological and colorectal surgery | 683 | AI-assisted surgical predictions | Standard estimation process | None | Accurate surgery duration prediction | NCT03471377 |
| 33. | Turino, et al.    | 2021 | Management and treatment of patients with obstructive sleep apnea using an intelligent monitoring system                                             | Spain         | Pulmonology | Obstructive sleep apnea               | 60  | Intelligent monitoring system    | Standard management         | None | Compliance to CPAP                   | NCT03116958 |

|     |              |      |                                                                                                                                                                  |       |                  |                      |    |                                            |                 |      |                                        |    |
|-----|--------------|------|------------------------------------------------------------------------------------------------------------------------------------------------------------------|-------|------------------|----------------------|----|--------------------------------------------|-----------------|------|----------------------------------------|----|
|     |              |      | based on machine learning aiming to improve continuous positive airway pressure treatment compliance:<br>Randomized controlled trial                             |       |                  |                      |    |                                            |                 |      |                                        |    |
| 34. | Wang, et al. | 2021 | Utilization of Ultrasonic Image Characteristics Combined with Endoscopic Detection on the Basis of Artificial Intelligence Algorithm in Diagnosis of Early Upper | China | Gastroenterology | Early gastric cancer | 80 | Endoscopy with AI-based ultrasound imaging | Endoscopy alone | None | Detection rate of upper gastric cancer | NR |

|     |            |      |                                                                                                                                                                                                 |       |                  |                      |      |                       |                   |        |                                        |                  |
|-----|------------|------|-------------------------------------------------------------------------------------------------------------------------------------------------------------------------------------------------|-------|------------------|----------------------|------|-----------------------|-------------------|--------|----------------------------------------|------------------|
|     |            |      | Gastrointestinal Cancer                                                                                                                                                                         |       |                  |                      |      |                       |                   |        |                                        |                  |
| 35. | Wu, et al. | 2021 | Evaluation of the effects of an artificial intelligence system on endoscopy quality and preliminary testing of its performance in detecting early gastric cancer: a randomized controlled trial | China | Gastroenterology | Early gastric cancer | 1050 | AI-aided endoscopy    | Endoscopy alone   | Single | Number of blind spots during endoscopy | ChiCTR1800018403 |
| 36. | Wu, et al. | 2021 | Effect of a deep learning-based system on the miss rate of gastric neoplasms during                                                                                                             | China | Gastroenterology | Gastric neoplasm     | 1886 | AI-assisted endoscopy | Unaided endoscopy | Single | Gastric neoplasm miss rate             | ChiCTR2000034453 |

|     |            |      |                                                                                                                          |       |                  |                  |      |                           |                          |      |                      |                  |
|-----|------------|------|--------------------------------------------------------------------------------------------------------------------------|-------|------------------|------------------|------|---------------------------|--------------------------|------|----------------------|------------------|
|     |            |      | upper gastrointestinal endoscopy: a single-centre, tandem, randomised controlled trial                                   |       |                  |                  |      |                           |                          |      |                      |                  |
| 37. | Xu, et al. | 2021 | The Clinical Value of Explainable Deep Learning for Diagnosing Fungal Keratitis Using in vivo Confocal Microscopy Images | China | Ophthalmology    | Fungal keratitis | 1089 | AI-assisted image reading | Unassisted image reading | None | Accuracy             | NR               |
| 38. | Xu, et al. | 2021 | Artificial intelligence-assisted colonoscopy: A prospective, multicenter, randomized                                     | China | Gastroenterology | Polyp            | 2352 | AI-assisted colonoscopy   | Conventional colonoscopy | None | Polyp detection rate | ChiCTR1800015607 |

|     |              |      |                                                                                                                                                      |               |            |                          |     |                                                        |                    |      |                                        |             |
|-----|--------------|------|------------------------------------------------------------------------------------------------------------------------------------------------------|---------------|------------|--------------------------|-----|--------------------------------------------------------|--------------------|------|----------------------------------------|-------------|
|     |              |      | controlled trial of polyp detection                                                                                                                  |               |            |                          |     |                                                        |                    |      |                                        |             |
| 39. | Yao, et al.  | 2021 | Artificial intelligence-enabled electrocardiograms for identification of patients with low ejection fraction: a pragmatic, randomized clinical trial | United States | Cardiology | Low ejection fraction    | 358 | AI-enabled electrocardiograms                          | Usual care         | None | New diagnosis of low ejection fraction | NCT04000087 |
| 40. | Zeng, et al. | 2021 | Long-Term Assessment of Rehabilitation Treatment of Sports through Artificial Intelligence Research                                                  | China         | Medicine   | Sports health management | 150 | AI-based personalized sports management service system | General management | None | Blood glucose, blood pressure, lipids  | NR          |

|     |               |      |                                                                                                                                                   |       |             |                |    |                                        |                    |        |                                                                        |    |
|-----|---------------|------|---------------------------------------------------------------------------------------------------------------------------------------------------|-------|-------------|----------------|----|----------------------------------------|--------------------|--------|------------------------------------------------------------------------|----|
| 41. | Zhang, et al. | 2021 | Artificial Intelligence Algorithm-Based Ultrasound Image Segmentation Technology in the Diagnosis of Breast Cancer Axillary Lymph Node Metastasis | China | Oncology    | Breast cancer  | 90 | AI-based ultrasound image segmentation | Routine ultrasound | Double | Accuracy metrics                                                       | NR |
| 42. | Zhang, et al. | 2021 | Value of Rehabilitation Training for Children with Cerebral Palsy Diagnosed and Analyzed by Computed Tomography                                   | China | Paediatrics | Cerebral palsy | 73 | AI-assisted analysis of brain images   | Original images    | None   | Cerebral artery blood flow velocity (VP) and Vascular pulse index (PI) | NR |

|  |  |  |                                                           |  |  |  |  |  |  |  |  |  |  |
|--|--|--|-----------------------------------------------------------|--|--|--|--|--|--|--|--|--|--|
|  |  |  | Imaging<br>Information<br>Features under<br>Deep Learning |  |  |  |  |  |  |  |  |  |  |
|--|--|--|-----------------------------------------------------------|--|--|--|--|--|--|--|--|--|--|

1. Sadasivam RS, Borglund EM, Adams R, Marlin BM, Houston TK. Impact of a collective intelligence tailored messaging system on smoking cessation: the Perspect randomized experiment. *JMIR* 2016;18(11):e285.
2. Morrison LG, Hargood C, Pejovic V, Geraghty AW, Lloyd S, Goodman N, et al. The effect of timing and frequency of push notifications on usage of a smartphone-based stress management intervention: an exploratory trial. *PloS one* 2017;12(1):e0169162.
3. Labovitz DL, Shafner L, Reyes Gil M, Virmani D, Hanina A. Using artificial intelligence to reduce the risk of nonadherence in patients on anticoagulation therapy. *Stroke* 2017;48(5):1416-9.
4. Rostill H, Nilforooshan R, Morgan A, Barnaghi P, Ream E, Chrysanthaki T. Technology integrated health management for dementia. *Br J Community Nurs* 2018;23(10):502-8.
5. Wang P, Berzin TM, Brown JRG, Bharadwaj S, Becq A, Xiao X, et al. Real-time automatic detection system increases colonoscopic polyp and adenoma detection rates: a prospective randomised controlled study. *Gut* 2019;68(10):1813-9.

6. Lin H, Li R, Liu Z, Chen J, Yang Y, Chen H, et al. Diagnostic efficacy and therapeutic decision-making capacity of an artificial intelligence platform for childhood cataracts in eye clinics: a multicentre randomized controlled trial. *EClinicalMedicine* 2019; 9: 52–9.
7. Voss C, Schwartz J, Daniels J, Kline A, Haber N, Washington P, et al. Effect of wearable digital intervention for improving socialization in children with autism spectrum disorder: a randomized clinical trial. *JAMA Pediatr* 2019;173(5):446-54.
8. Wu L, Zhang J, Zhou W, An P, Shen L, Liu J, et al. Randomised controlled trial of WISENSE, a real-time quality improving system for monitoring blind spots during esophagogastroduodenoscopy. *Gut* 2019;68(12):2161-9.
9. Wang P, Liu X, Berzin TM, Brown JRG, Liu P, Zhou C, et al. Effect of a deep-learning computer-aided detection system on adenoma detection during colonoscopy (CADE-DB trial): a double-blind randomised study. *Lancet Gastroenterol Hepatol* 2020;5(4):343-51.
10. Persell SD, Peprah YA, Lipiszko D, Lee JY, Li JJ, Ciolino JD, et al. Effect of home blood pressure monitoring via a smartphone hypertension coaching application or tracking application on adults with uncontrolled hypertension: a randomized clinical trial. *JAMA Netw Open* 2020;3(3):e200255-e.
11. Wijnberge M, Geerts BF, Hol L, Lemmers N, Mulder MP, Berge P, et al. Effect of a machine learning–derived early warning system for intraoperative hypotension vs standard care on depth and duration of intraoperative hypotension during elective noncardiac surgery: the HYPE randomized clinical trial. *JAMA* 2020;323(11):1052-60.



12. Pavel AM, Rennie JM, de Vries LS, Blennow M, Foran A, Shah DK, et al. A machine-learning algorithm for neonatal seizure recognition: a multicentre, randomised, controlled trial. *The Lancet Child & Adolescent Health* 2020;4(10):740-9.
13. Nimri R, Battelino T, Laffel LM, Slover RH, Schatz D, Weinzimer SA, et al. Insulin dose optimization using an automated artificial intelligence-based decision support system in youths with type 1 diabetes. *Nature medicine* 2020;26(9):1380-4.
14. Liu P, Wang P, Glissen Brown JR, Berzin TM, Zhou G, Liu W, et al. The single-monitor trial: an embedded CADe system increased adenoma detection during colonoscopy: a prospective randomized study. *Therap Adv Gastroenterol* 2020;13:1756284820979165.
15. Gong D, Wu L, Zhang J, Mu G, Shen L, Liu J, et al. Detection of colorectal adenomas with a real-time computer-aided system (ENDOANGEL): a randomised controlled study. *Lancet Gastroenterol Hepatol* 2020;5(4):352-61.
16. Luo Y, Zhang Y, Liu M, Lai Y, Liu P, Wang Z, Xing T, Huang Y, Li Y, Li A, Wang Y. Artificial intelligence-assisted colonoscopy for detection of colon polyps: a prospective, randomized cohort study. *Journal of Gastrointestinal Surgery* 2021;25(8):2011-8.
17. Anan T, Kajiki S, Oka H, et al. Effects of an Artificial Intelligence-Assisted Health Program on Workers With Neck/Shoulder Pain/Stiffness and Low Back Pain: Randomized Controlled Trial. *JMIR Mhealth Uhealth* 2021;9(9):e27535.
18. 1. Blomberg SN, Christensen HC, Lippert F, et al. Effect of Machine Learning on Dispatcher Recognition of Out-of-Hospital Cardiac Arrest During Calls to Emergency Medical Services: A Randomized Clinical Trial. *JAMA Netw Open* 2021;4(1):e2032320.
19. Chen J, Gao Y. The Role of Deep Learning-Based Echocardiography in the Diagnosis and Evaluation of the Effects of Routine Anti-Heart-Failure Western Medicines in Elderly Patients with Acute Left Heart Failure. *Journal of Healthcare Engineering* 2021;2021

20. Eng DK, Khandwala NB, Long J, et al. Artificial intelligence algorithm improves radiologist performance in skeletal age assessment: A prospective multicenter randomized controlled trial. *Radiology* 2021;301(3):692-99.
21. Harada Y, Katsukura S, Kawamura R, et al. Efficacy of artificial-intelligence-driven differential-diagnosis list on the diagnostic accuracy of physicians: An open-label randomized controlled study. *International Journal of Environmental Research and Public Health* 2021;18(4):1-10.
22. Hassoon A, Baig Y, Naiman DQ, et al. Randomized trial of two artificial intelligence coaching interventions to increase physical activity in cancer survivors. *npj Digital Medicine* 2021;4(1)
23. Jayakumar P, Moore MG, Furlough KA, et al. Comparison of an Artificial Intelligence-Enabled Patient Decision Aid vs Educational Material on Decision Quality, Shared Decision-Making, Patient Experience, and Functional Outcomes in Adults with Knee Osteoarthritis: A Randomized Clinical Trial. *JAMA Network Open* 2021;4(2)
24. Kamba S, Tamai N, Saitoh I, et al. Reducing adenoma miss rate of colonoscopy assisted by artificial intelligence: a multicenter randomized controlled trial. *Journal of Gastroenterology* 2021;56(8):746-57.
25. Luna A, Casertano L, Timmerberg J, et al. Artificial intelligence application versus physical therapist for squat evaluation: a randomized controlled trial. *Scientific reports* 2021;11(1):18109.

26. Medina R, Bouhaben J, de Ramon I, et al. Electrophysiological brain changes associated with cognitive improvement in a pediatric attention deficit hyperactivity disorder digital artificial intelligence-driven intervention: Randomized controlled trial. *Journal of Medical Internet Research* 2021;23(11)
27. Mertens S, Krois J, Cantu AG, et al. Artificial intelligence for caries detection: Randomized trial. *J Dent* 2021;115:103849.
28. Prochaska JJ, Vogel EA, Chieng A, et al. A randomized controlled trial of a therapeutic relational agent for reducing substance misuse during the COVID-19 pandemic. *Drug and Alcohol Dependence* 2021;227
29. Rafferty AJ, Hall R, Johnston CS. A novel mobile app (heali) for disease treatment in participants with irritable bowel syndrome: Randomized controlled pilot trial. *Journal of Medical Internet Research* 2021;23(3)
30. Seok J, Yoon S, Ryu CH, et al. A personalized 3d-printed model for obtaining informed consent process for thyroid surgery: A randomized clinical study using a deep learning approach with mesh-type 3d modeling. *Journal of Personalized Medicine* 2021;11(6)
31. Seol HY, Shrestha P, Muth JF, et al. Artificial intelligence-assisted clinical decision support for childhood asthma management: A randomized clinical trial. *PLoS ONE* 2021;16(8 August)
32. Stromblad CT, Baxter-King RG, Meisami A, et al. Effect of a Predictive Model on Planned Surgical Duration Accuracy, Patient Wait Time, and Use of Presurgical Resources: A Randomized Clinical Trial. *JAMA Surgery* 2021;156(4):315-21.

33. Turino C, Benitez ID, Rafael-Palou X, et al. Management and treatment of patients with obstructive sleep apnea using an intelligent monitoring system based on machine learning aiming to improve continuous positive airway pressure treatment compliance: Randomized controlled trial. *Journal of Medical Internet Research* 2021;23(10)
34. Wang L, Song H, Wang M, et al. Utilization of Ultrasonic Image Characteristics Combined with Endoscopic Detection on the Basis of Artificial Intelligence Algorithm in Diagnosis of Early Upper Gastrointestinal Cancer. *J Healthc Eng* 2021;2021:2773022.
35. Wu L, He X, Liu M, et al. Evaluation of the effects of an artificial intelligence system on endoscopy quality and preliminary testing of its performance in detecting early gastric cancer: a randomized controlled trial. *Endoscopy* 2021;53(12):1199-207
36. Wu L, Shang R, Sharma P, et al. Effect of a deep learning-based system on the miss rate of gastric neoplasms during upper gastrointestinal endoscopy: a single-centre, tandem, randomised controlled trial. *The Lancet Gastroenterology and Hepatology* 2021;6(9):700-08.
37. Xu F, Jiang L, He W, et al. The Clinical Value of Explainable Deep Learning for Diagnosing Fungal Keratitis Using in vivo Confocal Microscopy Images. *Frontiers in Medicine* 2021;8
38. Xu L, He X, Zhou J, et al. Artificial intelligence-assisted colonoscopy: A prospective, multicenter, randomized controlled trial of polyp detection. *Cancer Medicine* 2021;10(20):7184-93.
39. Yao X, Rushlow DR, Inselman JW, et al. Artificial intelligence-enabled electrocardiograms for identification of patients with low ejection fraction: a pragmatic, randomized clinical trial. *Nature Medicine* 2021;27(5):815-19.
40. Zeng C, Huang Y, Yu L, et al. Long-Term Assessment of Rehabilitation Treatment of Sports through Artificial Intelligence Research. *Comput Math Methods Med* 2021;2021:4980718.

41. Zhang L, Jia Z, Leng X, et al. Artificial Intelligence Algorithm-Based Ultrasound Image Segmentation Technology in the Diagnosis of Breast Cancer Axillary Lymph Node Metastasis. *J Healthc Eng* 2021;2021:8830260.
42. Zhang X, Wang Z, Liu J, et al. Value of Rehabilitation Training for Children with Cerebral Palsy Diagnosed and Analyzed by Computed Tomography Imaging Information Features under Deep Learning. *J Healthc Eng* 2021;2021:6472440.
